# Supplementary material for: Egr2 upregulation induced mitochondrial iron overload implicating in sevoflurane-induced cognitive deficits in developing mice
Source: Research Square preprint supplement (doi:10.21203/rs.3.rs-131690/v1), 2020-12-22
Supplement: Supplementary file 1 [file 318816d69992c528782eff59.csv]

Cluster	adj.Pval	nGenes	Pathways	Genes
A	2.37905296201675e-13	19	Neuron projection development	Mapt Draxin Nrep Gap43 Rac3 Trim67 Cd24a Dpysl3 Tnc Crmp1 Dpysl5 Epo Casp3 Tubb2b Dcx Shtn1 Dynlt1a Dynlt1f Dynlt1b
A	1.03718506882413e-12	19	Neuron development	Mapt Draxin Dcx Nrep Gap43 Rac3 Trim67 Cd24a Dpysl3 Tnc Crmp1 Dpysl5 Epo Casp3 Tubb2b Shtn1 Dynlt1a Dynlt1f Dynlt1b
A	2.79078481193595e-11	19	Neuron differentiation	Mapt Draxin Dcx Casp3 Nrep Gap43 Rac3 Trim67 Cd24a Dpysl3 Tnc Crmp1 Dpysl5 Epo Tubb2b Shtn1 Dynlt1a Dynlt1f Dynlt1b
A	3.09404157407684e-11	20	Neurogenesis	Mapt Draxin Dcx Casp3 Nrep Tubb2b Gap43 Rac3 Trim67 Cd24a Dpysl3 Tnc Crmp1 Dpysl5 Epo Shtn1 Fabp7 Dynlt1a Dynlt1f Dynlt1b
A	3.34019565365118e-11	15	Regulation of neuron differentiation	Nrep Draxin Trim67 Cd24a Mapt Dpysl3 Crmp1 Epo Tubb2b Rac3 Dynlt1a Dynlt1f Dynlt1b Dcx Shtn1
A	6.86020848052715e-11	19	Generation of neurons	Mapt Draxin Dcx Casp3 Nrep Tubb2b Gap43 Rac3 Trim67 Cd24a Dpysl3 Tnc Crmp1 Dpysl5 Epo Shtn1 Dynlt1a Dynlt1f Dynlt1b
A	1.44151437653834e-10	16	Regulation of nervous system development	Nrep Draxin Trim67 Cd24a Mapt Dpysl3 Crmp1 Epo Shtn1 Tubb2b Gap43 Rac3 Dynlt1a Dynlt1f Dynlt1b Dcx
A	3.0237609012523e-10	13	Regulation of neuron projection development	Draxin Trim67 Cd24a Mapt Dpysl3 Crmp1 Epo Tubb2b Dynlt1a Dynlt1f Dynlt1b Dcx Shtn1
A	3.51156017349472e-10	15	Regulation of neurogenesis	Nrep Draxin Trim67 Cd24a Mapt Dpysl3 Crmp1 Epo Shtn1 Tubb2b Rac3 Dynlt1a Dynlt1f Dynlt1b Dcx
A	3.7574221491052e-10	14	Regulation of plasma membrane bounded cell projection organization	Draxin Trim67 Cd24a Mapt Dpysl3 Crmp1 Epo Tubb2b Gap43 Dynlt1a Dynlt1f Dynlt1b Dcx Shtn1
A	3.7574221491052e-10	11	Positive regulation of neuron projection development	Trim67 Cd24a Mapt Dpysl3 Epo Tubb2b Dynlt1a Dynlt1f Dynlt1b Dcx Shtn1
A	1.79234233848361e-09	15	Regulation of cell development	Nrep Draxin Trim67 Cd24a Rac3 Mapt Dpysl3 Crmp1 Epo Shtn1 Tubb2b Dynlt1a Dynlt1f Dynlt1b Dcx
B	3.51818131952513e-13	10	Ensheathment of neurons	Mal Plp1 Mbp Cntnap1 Ugt8a Fa2h Mag Cldn11 Gjc3 Trf
B	1.56596130483264e-11	9	Myelination	Mal Plp1 Mbp Cntnap1 Ugt8a Fa2h Mag Gjc3 Trf
B	7.52258616718575e-09	7	Oligodendrocyte differentiation	Plp1 Cntnap1 Gsn Cnp Fa2h Mag Enpp2
B	1.91149232984794e-08	9	Gliogenesis	Plp1 Cntnap1 Gsn Mag Gjc2 Cnp Fa2h Enpp2 Trf
B	1.76635578744952e-07	5	Oligodendrocyte development	Plp1 Cntnap1 Gsn Fa2h Mag
B	3.14905636538887e-07	16	Nervous system development	Hapln4 Mal Plp1 Mbp Cnp Cntnap1 Arc Gsn Mag Gjc2 Ugt8a Fa2h Cldn11 Gjc3 Enpp2 Trf
B	5.88574250193114e-07	4	Central nervous system myelination	Plp1 Cntnap1 Fa2h Mag
B	7.11410035196621e-07	7	Glial cell differentiation	Plp1 Cntnap1 Gsn Mag Cnp Fa2h Enpp2
B	8.34512676089566e-07	3	Protein localization to paranode region of axon	Cntnap1 Mal Ugt8a
B	8.25390510880925e-05	9	Central nervous system development	Hapln4 Plp1 Cnp Cntnap1 Gsn Mag Gjc2 Fa2h Enpp2
B	0.000156473433773667	4	Positive regulation of gliogenesis	Mag Gjc2 Enpp2 Trf
C	0.00407519406059106	3	Import across plasma membrane	Kcnj13 Sept2 Kcne2
C	0.00407519406059106	2	Potassium ion import across plasma membrane	Kcnj13 Kcne2
C	0.00407519406059106	5	Ion transmembrane transport	Kcnj13 Sept2 Aqp1 Clic6 Kcne2
C	0.00407519406059106	4	Regulation of transmembrane transport	Sept2 Clic6 Kcne2 Kcnj13
C	0.00407519406059106	3	Cellular potassium ion transport	Kcnj13 Aqp1 Kcne2
C	0.00857238408803931	4	Inorganic ion transmembrane transport	Kcnj13 Aqp1 Clic6 Kcne2
C	0.00857238408803931	2	Drug transmembrane transport	Aqp1 Sept2
C	0.00857238408803931	3	Aging	1500015O10Rik Kcne2 Kl
